# Supplementary material for: Development of predictive QSAR models for Vibrio fischeri toxicity of ionic liquids and their true external and experimental validation tests
Source: Royal Society of Chemistry journal article supplement (doi:10.1039/c6tx00180g), 2016-01-01
Supplement: c6tx00180g1.pdf [file c6tx00180g1.pdf]

## Supporting information

### Development of predictive QSAR models for *Vibrio fischeri* toxicity of ionic liquids and their true external and experimental validation tests

**Rudra Narayan Das<sup>1</sup>, Tânia E. Sintra<sup>2</sup>, João A. P. Coutinho<sup>2</sup>, Sónia P. M. Ventura<sup>2\*</sup>, Kunal Roy<sup>1,3\*</sup>, Paul L. A. Popelier<sup>3\*</sup>**

<sup>1</sup>Drug Theoretics and Cheminformatics Laboratory, Department of Pharmaceutical Technology, Jadavpur University, Kolkata 700 032, India

<sup>2</sup>CICECO - Aveiro Institute of Materials, Department of Chemistry, University of Aveiro, 3810-193 Aveiro, Portugal

<sup>3</sup>Manchester Institute of Biotechnology, 131 Princess Street, Manchester M1 7DN, Great Britain

\*Authors for correspondence

Email: [kunalroy\\_in@yahoo.com](mailto:kunalroy_in@yahoo.com) (K Roy);

[paul.popelier@manchester.ac.uk](mailto:paul.popelier@manchester.ac.uk) (P Popelier);

[spventura@ua.pt](mailto:spventura@ua.pt) (S Ventura)

**Table S1.** Categorical list of the used descriptor pool.

| Descriptor group         | Variables                                                                                                                                                                                                                                                                                                                                                                                                                                                                                                                                                                                                                                                                                                                                                                                                                                                                                                                                                                                                                                                                     |
|--------------------------|-------------------------------------------------------------------------------------------------------------------------------------------------------------------------------------------------------------------------------------------------------------------------------------------------------------------------------------------------------------------------------------------------------------------------------------------------------------------------------------------------------------------------------------------------------------------------------------------------------------------------------------------------------------------------------------------------------------------------------------------------------------------------------------------------------------------------------------------------------------------------------------------------------------------------------------------------------------------------------------------------------------------------------------------------------------------------------|
| ETA indices              | First generation: $\sum\alpha$ , $\sum\alpha/N_v$ , $(\sum\alpha)_P/\sum\alpha$ , $(\sum\alpha)_Y/\sum\alpha$ , $(\sum\alpha)_X/\sum\alpha$ , $\sum\beta'$ , $\sum\beta'_{s'}$ , $\sum\beta'_{ns}$ , $\eta'$ ( $\eta/N_v$ ), $\eta'_F$ , $\eta'^{local}$ , $\eta'_F^{local}$ , $\eta'_B$<br>Second generation: $\Delta\alpha_B$ , $\Delta\epsilon_A$ , $\Delta\epsilon_B$ , $\Delta\epsilon_C$ , $\Delta\epsilon_D$ , $\Delta\psi_A$ , $\Delta\psi_B$ , $\Delta\beta'$                                                                                                                                                                                                                                                                                                                                                                                                                                                                                                                                                                                                        |
| QTMS parameters          | $\rho$ , $\lambda_1$ , $\lambda_2$ , $\lambda_3$ , $\nabla^2\rho$ , $\epsilon$ , $K$ , $G$ , $R_e$                                                                                                                                                                                                                                                                                                                                                                                                                                                                                                                                                                                                                                                                                                                                                                                                                                                                                                                                                                            |
| Lipophilicity parameters | $\log k_0$ (using ETA and QTMS variables), ALOGP                                                                                                                                                                                                                                                                                                                                                                                                                                                                                                                                                                                                                                                                                                                                                                                                                                                                                                                                                                                                                              |
| Constitutional indices   | MW, AMW, Sv, Se, Sp, Si, Mv, Me, Mp, Mi, nAT, nSK, nBT, nBO, nBM, SCBO, RBN, RBF, nDB, nTB, nAB, nH, nC, nN, nO, nP, nS, nF, nCL, nBR, nI, nB, nHM, nHet, nX, H%, C%, N%, O%, X%, nCsp3, nCsp2, nCsp                                                                                                                                                                                                                                                                                                                                                                                                                                                                                                                                                                                                                                                                                                                                                                                                                                                                          |
| Ring descriptors         | nCIC, Rbrid, MCD, RCI, NNRS, nR05, nR06, nR07, nR09, nBnz, ARR, D/Dtr05, D/Dtr06                                                                                                                                                                                                                                                                                                                                                                                                                                                                                                                                                                                                                                                                                                                                                                                                                                                                                                                                                                                              |
| Topological indices      | ZM1, ZM1V, ZM1Kup, ZM1Mad, ZM1Per, ZM1MulPer, ZM2, ZM2V, ZM2Kup, ZM2Mad, ZM2Per, ZM2MulPer, ON0, ON0V, ON1, ON1V, Qindex, BBI, DBI, SNar, HNar, GNar, Xt, Dz, Ram, BLI, Pol, LPRS, MSD, SPI, PJI2, ECC, AECC, DECC, MDDD, UNIP, CENT, VAR, ICR, SMTI, SMTIV, GMTI, GMTIV, Xu, CSI, Wap, S1K, S2K, S3K, PHI, PW2, PW3, PW4, PW5, MAXDN, MAXDP, DELS, TIE, Psi_i_s, Psi_i_A, Psi_i_0, Psi_i_1, Psi_i_t, Psi_i_0d, Psi_i_1d, Psi_i_1s, Psi_e_A, Psi_e_0, Psi_e_1, Psi_e_t, Psi_e_0d, Psi_e_1d, Psi_e_1s, BAC, LOC                                                                                                                                                                                                                                                                                                                                                                                                                                                                                                                                                                |
| Connectivity indices     | X0, X1, X2, X3, X4, X5, X0A, X1A, X2A, X3A, X4A, X5A, X0v, X1v, X2v, X3v, X4v, X5v, X0Av, X1Av, X2Av, X3Av, X4Av, X5Av, X0sol, X1sol, X2sol, X3sol, X4sol, X5sol, XMOD, RDCHI, RDSQ, X1Kup, X1Mad, X1Per, X1MulPer                                                                                                                                                                                                                                                                                                                                                                                                                                                                                                                                                                                                                                                                                                                                                                                                                                                            |
| Information indices      | ISIZ, IAC, AAC, IDE, IDM, IDDE, IDDM, IDET, IDMT, IVDE, IVDM, S0K, HVcpx, HDcpx, Uindex, Vindex, Xindex, Yindex, IC0, IC1, IC2, IC3, IC4, IC5, TIC0, TIC1, TIC2, TIC3, TIC4, TIC5, SIC0, SIC1, SIC2, SIC3, SIC4, SIC5, CIC0, CIC1, CIC2, CIC3, CIC4, CIC5, BIC0, BIC1, BIC2, BIC3, BIC4, BIC5                                                                                                                                                                                                                                                                                                                                                                                                                                                                                                                                                                                                                                                                                                                                                                                 |
| Functional group counts  | nCp, nCs, nCt, nCq, nCrs, nCrt, nCrq, nCar, nCbH, nCb-, nCconj, nR=Cp, nR=Cs, nR=Ct, n=C=, nR#CH/X, nR#C-, nROCN, nArOCN, nRNCO, nArNCO, nRSCN, nArSCN, nRNCS, nArNCS, nRCOOH, nArCOOH, nRCOOR, nArCOOR, nRCONH2, nArCONH2, nRCONHR, nArCONHR, nRCONR2, nArCONR2, nROCON, nArOCON, nRCOX, nArCOX, nRCSOH, nArCSOH, nRCSSH, nArCSSH, nRCOSR, nArCOSR, nRCSSR, nArCSSR, nRCHO, nArCHO, nRCO, nArCO, nCONN, nC=O(O)2, nN=C-N<, nC(=N)N2, nRC=N, nArC=N, nRCNO, nArCNO, nRNH2, nArNH2, nRNHR, nArNHR, nRNR2, nArNR2, nN-N, nN=N, nRCN, nArCN, nN+, nNq, nRNHO, nArNHO, nRNNOx, nArNNOx, nRNO, nArNO, nRNO2, nArNO2, nN(CO)2, nC=N-N<, nROH, nArOH, nOHp, nOHs, nOht, nROR, nArOR, nROX, nArOX, nO(C=O)2, nH2O, nSH, nC=S, nRSR, nRSSR, nSO, nS(=O)2, nSOH, nSOOH, nSO2OH, nSO3OH, nSO2, nSO3, nSO4, nSO2N, nPO3, nPO4, nPR3, nP(=O)O2R, nP(=O)R3/nPR5, nCH2RX, nCHR2X, nCR3X, nR=CHX, nR=CRX, nR#CX, nCHRX2, nCR2X2, nR=CX2, nCRX3, nArX, nCXr, nCXr=, nCconjX, nAziridines, nOxiranes, nThiranes, nAzetidines, nOxetanes, nThioethanes, nBeta-Lactams, nPyrrolidines, nOxolanes, |

|                           |                                                                                                                                                                                                                                                                                                                                                                                                                                                                                                                                                                                                                                                                                                                                                                                                                                                                                                                                                                                                                                                                                                                                                                                                                                                                                                                                                                                                                                                                                                                                                                                                                                                                                                                                                                                                                                                                                                                                                                                                                                                                                                                                                                              |
|---------------------------|------------------------------------------------------------------------------------------------------------------------------------------------------------------------------------------------------------------------------------------------------------------------------------------------------------------------------------------------------------------------------------------------------------------------------------------------------------------------------------------------------------------------------------------------------------------------------------------------------------------------------------------------------------------------------------------------------------------------------------------------------------------------------------------------------------------------------------------------------------------------------------------------------------------------------------------------------------------------------------------------------------------------------------------------------------------------------------------------------------------------------------------------------------------------------------------------------------------------------------------------------------------------------------------------------------------------------------------------------------------------------------------------------------------------------------------------------------------------------------------------------------------------------------------------------------------------------------------------------------------------------------------------------------------------------------------------------------------------------------------------------------------------------------------------------------------------------------------------------------------------------------------------------------------------------------------------------------------------------------------------------------------------------------------------------------------------------------------------------------------------------------------------------------------------------|
|                           | ntH-Thiophenes, nPyrroles, nPyrazoles, nImidazoles, nFuranes, nThiophenes, nOxazoles, nIsoxazoles, nThiazoles, nIsothiazoles, nTriazoles, nPyridines, nPyridazines, nPyrimidines, nPyrazines, n135-Triazines, n124-Triazines, nHDon, nHAcc, nHBonds, N-aromatics, naAromAtom                                                                                                                                                                                                                                                                                                                                                                                                                                                                                                                                                                                                                                                                                                                                                                                                                                                                                                                                                                                                                                                                                                                                                                                                                                                                                                                                                                                                                                                                                                                                                                                                                                                                                                                                                                                                                                                                                                 |
| Atom-centred fragments    | C-001, C-002, C-003, C-004, C-005, C-006, C-007, C-008, C-009, C-010, C-011, C-012, C-013, C-014, C-015, C-016, C-017, C-018, C-019, C-020, C-021, C-022, C-023, C-024, C-025, C-026, C-027, C-028, C-029, C-030, C-031, C-032, C-033, C-034, C-035, C-036, C-037, C-038, C-039, C-040, C-041, C-042, C-043, C-044, H-046, H-047, H-048, H-049, H-050, H-051, H-052, H-053, H-054, H-055, O-056, O-057, O-058, O-059, O-060, O-061, O-062, O-063, N-066, N-067, N-068, N-069, N-070, N-071, N-072, N-073, N-074, N-075, N-076, N-077, N-078, N-079, F-081, F-082, F-083, F-084, F-085, Cl-086, Cl-087, Cl-088, Cl-089, Cl-090, Br-091, Br-092, Br-093, Br-094, Br-095, I-096, I-097, I-098, I-099, I-100, F-101, Cl-102, Br-103, I-104, S-106, S-107, S-108, S-109, S-110, P-115, P-116, P-117, P-118, P-119, P-120                                                                                                                                                                                                                                                                                                                                                                                                                                                                                                                                                                                                                                                                                                                                                                                                                                                                                                                                                                                                                                                                                                                                                                                                                                                                                                                                                          |
| Atom-type E-state indices | SsCH3, SdCH2, SssCH2, StCH, SdsCH, SaaCH, SsssCH, SddC, StsC, SdssC, SaasC, SaaaC, SssssC, SsNH2, SssNH, SdNH, SsssN, SdsN, SaaN, StN, SsNH3+, SssNH2+, SdNH2+, SsssNH+, SssssN+, SddsN, SaasN, SaaNH, SsOH, SdO, SssO, SaaO, SsPH2, SssPH, SsssP, SdsssP, SddsP, SsssssP, SsSH, SdS, SssS, SaaS, SdssS, SddssS, SsssssS, SsF, SsCl, SsBr, SsI                                                                                                                                                                                                                                                                                                                                                                                                                                                                                                                                                                                                                                                                                                                                                                                                                                                                                                                                                                                                                                                                                                                                                                                                                                                                                                                                                                                                                                                                                                                                                                                                                                                                                                                                                                                                                               |
| 2D atom pairs             | T(N..N), T(N..O), T(N..S), T(N..P), T(N..F), T(N..Cl), T(N..Br), T(N..I), T(O..O), T(O..S), T(O..P), T(O..F), T(O..Cl), T(O..Br), T(O..I), T(S..S), T(S..P), T(S..F), T(S..Cl), T(S..Br), T(S..I), T(P..P), T(P..F), T(P..Cl), T(P..Br), T(P..I), T(F..F), T(F..Cl), T(F..Br), T(F..I), T(Cl..Cl), T(Cl..Br), T(Cl..I), T(Br..Br), T(Br..I), T(I..I), B01[C-C], B01[C-N], B01[C-O], B01[C-S], B01[C-P], B01[C-F], B01[C-Cl], B01[C-Br], B01[C-I], B01[C-B], B01[C-Si], B01[C-X], B01[N-N], B01[N-O], B01[N-S], B01[N-P], B01[N-F], B01[N-Cl], B01[N-Br], B01[N-I], B01[N-B], B01[N-Si], B01[N-X], B01[O-O], B01[O-S], B01[O-P], B01[O-F], B01[O-Cl], B01[O-Br], B01[O-I], B01[O-B], B01[O-Si], B01[O-X], B01[S-S], B01[S-P], B01[S-F], B01[S-Cl], B01[S-Br], B01[S-I], B01[S-B], B01[S-Si], B01[S-X], B01[P-P], B01[P-F], B01[P-Cl], B01[P-Br], B01[P-I], B01[P-B], B01[P-Si], B01[P-X], B01[F-F], B01[F-Cl], B01[F-Br], B01[F-I], B01[F-B], B01[F-Si], B01[F-X], B01[Cl-Cl], B01[Cl-Br], B01[Cl-I], B01[Cl-B], B01[Cl-Si], B01[Cl-X], B01[Br-Br], B01[Br-I], B01[Br-B], B01[Br-Si], B01[Br-X], B01[I-I], B01[I-B], B01[I-Si], B01[I-X], B01[B-B], B01[B-Si], B01[B-X], B01[Si-Si], B01[Si-X], B01[X-X], B02[C-C], B02[C-N], B02[C-O], B02[C-S], B02[C-P], B02[C-F], B02[C-Cl], B02[C-Br], B02[C-I], B02[C-B], B02[C-Si], B02[C-X], B02[N-N], B02[N-O], B02[N-S], B02[N-P], B02[N-F], B02[N-Cl], B02[N-Br], B02[N-I], B02[N-B], B02[N-Si], B02[N-X], B02[O-O], B02[O-S], B02[O-P], B02[O-F], B02[O-Cl], B02[O-Br], B02[O-I], B02[O-B], B02[O-Si], B02[O-X], B02[S-S], B02[S-P], B02[S-F], B02[S-Cl], B02[S-Br], B02[S-I], B02[S-B], B02[S-Si], B02[S-X], B02[P-P], B02[P-F], B02[P-Cl], B02[P-Br], B02[P-I], B02[P-B], B02[P-Si], B02[P-X], B02[F-F], B02[F-Cl], B02[F-Br], B02[F-I], B02[F-B], B02[F-Si], B02[F-X], B02[Cl-Cl], B02[Cl-Br], B02[Cl-I], B02[Cl-B], B02[Cl-Si], B02[Cl-X], B02[Br-Br], B02[Br-I], B02[Br-B], B02[Br-Si], B02[Br-X], B02[I-I], B02[I-B], B02[I-Si], B02[I-X], B02[B-B], B02[B-Si], B02[B-X], B02[Si-Si], B02[Si-X], B02[X-X], B03[C-C], B03[C-N], B03[C-O], B03[C-S], B03[C-P], B03[C-F], B03[C-Cl], B03[C-Br], B03[C-I], B03[C-B], B03[C-Si], |

---

B03[C-X], B03[N-N], B03[N-O], B03[N-S], B03[N-P], B03[N-F], B03[N-Cl], B03[N-Br], B03[N-I], B03[N-B], B03[N-Si], B03[N-X], B03[O-O], B03[O-S], B03[O-P], B03[O-F], B03[O-Cl], B03[O-Br], B03[O-I], B03[O-B], B03[O-Si], B03[O-X], B03[S-S], B03[S-P], B03[S-F], B03[S-Cl], B03[S-Br], B03[S-I], B03[S-B], B03[S-Si], B03[S-X], B03[P-P], B03[P-F], B03[P-Cl], B03[P-Br], B03[P-I], B03[P-B], B03[P-Si], B03[P-X], B03[F-F], B03[F-Cl], B03[F-Br], B03[F-I], B03[F-B], B03[F-Si], B03[F-X], B03[Cl-Cl], B03[Cl-Br], B03[Cl-I], B03[Cl-B], B03[Cl-Si], B03[Cl-X], B03[Br-Br], B03[Br-I], B03[Br-B], B03[Br-Si], B03[Br-X], B03[I-I], B03[I-B], B03[I-Si], B03[I-X], B03[B-B], B03[B-Si], B03[B-X], B03[Si-Si], B03[Si-X], B03[X-X], B04[C-C], B04[C-N], B04[C-O], B04[C-S], B04[C-P], B04[C-F], B04[C-Cl], B04[C-Br], B04[C-I], B04[C-B], B04[C-Si], B04[C-X], B04[N-N], B04[N-O], B04[N-S], B04[N-P], B04[N-F], B04[N-Cl], B04[N-Br], B04[N-I], B04[N-B], B04[N-Si], B04[N-X], B04[O-O], B04[O-S], B04[O-P], B04[O-F], B04[O-Cl], B04[O-Br], B04[O-I], B04[O-B], B04[O-Si], B04[O-X], B04[S-S], B04[S-P], B04[S-F], B04[S-Cl], B04[S-Br], B04[S-I], B04[S-B], B04[S-Si], B04[S-X], B04[P-P], B04[P-F], B04[P-Cl], B04[P-Br], B04[P-I], B04[P-B], B04[P-Si], B04[P-X], B04[F-F], B04[F-Cl], B04[F-Br], B04[F-I], B04[F-B], B04[F-Si], B04[F-X], B04[Cl-Cl], B04[Cl-Br], B04[Cl-I], B04[Cl-B], B04[Cl-Si], B04[Cl-X], B04[Br-Br], B04[Br-I], B04[Br-B], B04[Br-Si], B04[Br-X], B04[I-I], B04[I-B], B04[I-Si], B04[I-X], B04[B-B], B04[B-Si], B04[B-X], B04[Si-Si], B04[Si-X], B04[X-X], B05[C-C], B05[C-N], B05[C-O], B05[C-S], B05[C-P], B05[C-F], B05[C-Cl], B05[C-Br], B05[C-I], B05[C-B], B05[C-Si], B05[C-X], B05[N-N], B05[N-O], B05[N-S], B05[N-P], B05[N-F], B05[N-Cl], B05[N-Br], B05[N-I], B05[N-B], B05[N-Si], B05[N-X], B05[O-O], B05[O-S], B05[O-P], B05[O-F], B05[O-Cl], B05[O-Br], B05[O-I], B05[O-B], B05[O-Si], B05[O-X], B05[S-S], B05[S-P], B05[S-F], B05[S-Cl], B05[S-Br], B05[S-I], B05[S-B], B05[S-Si], B05[S-X], B05[P-P], B05[P-F], B05[P-Cl], B05[P-Br], B05[P-I], B05[P-B], B05[P-Si], B05[P-X], B05[F-F], B05[F-Cl], B05[F-Br], B05[F-I], B05[F-B], B05[F-Si], B05[F-X], B05[Cl-Cl], B05[Cl-Br], B05[Cl-I], B05[Cl-B], B05[Cl-Si], B05[Cl-X], B05[Br-Br], B05[Br-I], B05[Br-B], B05[Br-Si], B05[Br-X], B05[I-I], B05[I-B], B05[I-Si], B05[I-X], B05[B-B], B05[B-Si], B05[B-X], B05[Si-Si], B05[Si-X], B05[X-X], B06[C-C], B06[C-N], B06[C-O], B06[C-S], B06[C-P], B06[C-F], B06[C-Cl], B06[C-Br], B06[C-I], B06[C-B], B06[C-Si], B06[C-X], B06[N-N], B06[N-O], B06[N-S], B06[N-P], B06[N-F], B06[N-Cl], B06[N-Br], B06[N-I], B06[N-B], B06[N-Si], B06[N-X], B06[O-O], B06[O-S], B06[O-P], B06[O-F], B06[O-Cl], B06[O-Br], B06[O-I], B06[O-B], B06[O-Si], B06[O-X], B06[S-S], B06[S-P], B06[S-F], B06[S-Cl], B06[S-Br], B06[S-I], B06[S-B], B06[S-Si], B06[S-X], B06[P-P], B06[P-F], B06[P-Cl], B06[P-Br], B06[P-I], B06[P-B], B06[P-Si], B06[P-X], B06[F-F], B06[F-Cl], B06[F-Br], B06[F-I], B06[F-B], B06[F-Si], B06[F-X], B06[Cl-Cl], B06[Cl-Br], B06[Cl-I], B06[Cl-B], B06[Cl-Si], B06[Cl-X], B06[Br-Br], B06[Br-I], B06[Br-B], B06[Br-Si], B06[Br-X], B06[I-I], B06[I-B], B06[I-Si], B06[I-X], B06[B-B], B06[B-Si], B06[B-X], B06[Si-Si], B06[Si-X], B06[X-X], B07[C-C], B07[C-N], B07[C-O], B07[C-S], B07[C-P], B07[C-F], B07[C-Cl], B07[C-Br], B07[C-I], B07[C-B], B07[C-Si], B07[C-X], B07[N-N], B07[N-O], B07[N-S], B07[N-P], B07[N-F], B07[N-Cl], B07[N-Br], B07[N-I], B07[N-B], B07[N-Si], B07[N-X], B07[O-O], B07[O-S], B07[O-P], B07[O-F], B07[O-Cl], B07[O-Br], B07[O-I], B07[O-B], B07[O-Si], B07[O-X], B07[S-S], B07[S-P], B07[S-F], B07[S-

---

---

Cl], B07[S-Br], B07[S-I], B07[S-B], B07[S-Si], B07[S-X], B07[P-P], B07[P-F], B07[P-Cl], B07[P-Br], B07[P-I], B07[P-B], B07[P-Si], B07[P-X], B07[F-F], B07[F-Cl], B07[F-Br], B07[F-I], B07[F-B], B07[F-Si], B07[F-X], B07[Cl-Cl], B07[Cl-Br], B07[Cl-I], B07[Cl-B], B07[Cl-Si], B07[Cl-X], B07[Br-Br], B07[Br-I], B07[Br-B], B07[Br-Si], B07[Br-X], B07[I-I], B07[I-B], B07[I-Si], B07[I-X], B07[B-B], B07[B-Si], B07[B-X], B07[Si-Si], B07[Si-X], B07[X-X], B08[C-C], B08[C-N], B08[C-O], B08[C-S], B08[C-P], B08[C-F], B08[C-Cl], B08[C-Br], B08[C-I], B08[C-B], B08[C-Si], B08[C-X], B08[N-N], B08[N-O], B08[N-S], B08[N-P], B08[N-F], B08[N-Cl], B08[N-Br], B08[N-I], B08[N-B], B08[N-Si], B08[N-X], B08[O-O], B08[O-S], B08[O-P], B08[O-F], B08[O-Cl], B08[O-Br], B08[O-I], B08[O-B], B08[O-Si], B08[O-X], B08[S-S], B08[S-P], B08[S-F], B08[S-Cl], B08[S-Br], B08[S-I], B08[S-B], B08[S-Si], B08[S-X], B08[P-P], B08[P-F], B08[P-Cl], B08[P-Br], B08[P-I], B08[P-B], B08[P-Si], B08[P-X], B08[F-F], B08[F-Cl], B08[F-Br], B08[F-I], B08[F-B], B08[F-Si], B08[F-X], B08[Cl-Cl], B08[Cl-Br], B08[Cl-I], B08[Cl-B], B08[Cl-Si], B08[Cl-X], B08[Br-Br], B08[Br-I], B08[Br-B], B08[Br-Si], B08[Br-X], B08[I-I], B08[I-B], B08[I-Si], B08[I-X], B08[B-B], B08[B-Si], B08[B-X], B08[Si-Si], B08[Si-X], B08[X-X], B09[C-C], B09[C-N], B09[C-O], B09[C-S], B09[C-P], B09[C-F], B09[C-Cl], B09[C-Br], B09[C-I], B09[C-B], B09[C-Si], B09[C-X], B09[N-N], B09[N-O], B09[N-S], B09[N-P], B09[N-F], B09[N-Cl], B09[N-Br], B09[N-I], B09[N-B], B09[N-Si], B09[N-X], B09[O-O], B09[O-S], B09[O-P], B09[O-F], B09[O-Cl], B09[O-Br], B09[O-I], B09[O-B], B09[O-Si], B09[O-X], B09[S-S], B09[S-P], B09[S-F], B09[S-Cl], B09[S-Br], B09[S-I], B09[S-B], B09[S-Si], B09[S-X], B09[P-P], B09[P-F], B09[P-Cl], B09[P-Br], B09[P-I], B09[P-B], B09[P-Si], B09[P-X], B09[F-F], B09[F-Cl], B09[F-Br], B09[F-I], B09[F-B], B09[F-Si], B09[F-X], B09[Cl-Cl], B09[Cl-Br], B09[Cl-I], B09[Cl-B], B09[Cl-Si], B09[Cl-X], B09[Br-Br], B09[Br-I], B09[Br-B], B09[Br-Si], B09[Br-X], B09[I-I], B09[I-B], B09[I-Si], B09[I-X], B09[B-B], B09[B-Si], B09[B-X], B09[Si-Si], B09[Si-X], B09[X-X], B10[C-C], B10[C-N], B10[C-O], B10[C-S], B10[C-P], B10[C-F], B10[C-Cl], B10[C-Br], B10[C-I], B10[C-B], B10[C-Si], B10[C-X], B10[N-N], B10[N-O], B10[N-S], B10[N-P], B10[N-F], B10[N-Cl], B10[N-Br], B10[N-I], B10[N-B], B10[N-Si], B10[N-X], B10[O-O], B10[O-S], B10[O-P], B10[O-F], B10[O-Cl], B10[O-Br], B10[O-I], B10[O-B], B10[O-Si], B10[O-X], B10[S-S], B10[S-P], B10[S-F], B10[S-Cl], B10[S-Br], B10[S-I], B10[S-B], B10[S-Si], B10[S-X], B10[P-P], B10[P-F], B10[P-Cl], B10[P-Br], B10[P-I], B10[P-B], B10[P-Si], B10[P-X], B10[F-F], B10[F-Cl], B10[F-Br], B10[F-I], B10[F-B], B10[F-Si], B10[F-X], B10[Cl-Cl], B10[Cl-Br], B10[Cl-I], B10[Cl-B], B10[Cl-Si], B10[Cl-X], B10[Br-Br], B10[Br-I], B10[Br-B], B10[Br-Si], B10[Br-X], B10[I-I], B10[I-B], B10[I-Si], B10[I-X], B10[B-B], B10[B-Si], B10[B-X], B10[Si-Si], B10[Si-X], B10[X-X]

CATS 2D parameters

CATS2D\_00\_DD, CATS2D\_01\_DD, CATS2D\_02\_DD, CATS2D\_03\_DD, CATS2D\_04\_DD, CATS2D\_05\_DD, CATS2D\_06\_DD, CATS2D\_07\_DD, CATS2D\_08\_DD, CATS2D\_09\_DD, CATS2D\_00\_DA, CATS2D\_01\_DA, CATS2D\_02\_DA, CATS2D\_03\_DA, CATS2D\_04\_DA, CATS2D\_05\_DA, CATS2D\_06\_DA, CATS2D\_07\_DA, CATS2D\_08\_DA, CATS2D\_09\_DA, CATS2D\_00\_DP, CATS2D\_01\_DP, CATS2D\_02\_DP, CATS2D\_03\_DP, CATS2D\_04\_DP, CATS2D\_05\_DP, CATS2D\_06\_DP, CATS2D\_07\_DP, CATS2D\_08\_DP, CATS2D\_09\_DP, CATS2D\_00\_DN, CATS2D\_01\_DN, CATS2D\_02\_DN, CATS2D\_03\_DN, CATS2D\_04\_DN, CATS2D\_05\_DN,

---

---

CATS2D\_06\_DN, CATS2D\_07\_DN, CATS2D\_08\_DN, CATS2D\_09\_DN, CATS2D\_00\_DL, CATS2D\_01\_DL,  
CATS2D\_02\_DL, CATS2D\_03\_DL, CATS2D\_04\_DL, CATS2D\_05\_DL, CATS2D\_06\_DL, CATS2D\_07\_DL,  
CATS2D\_08\_DL, CATS2D\_09\_DL, CATS2D\_00\_AA, CATS2D\_01\_AA, CATS2D\_02\_AA, CATS2D\_03\_AA,  
CATS2D\_04\_AA, CATS2D\_05\_AA, CATS2D\_06\_AA, CATS2D\_07\_AA, CATS2D\_08\_AA, CATS2D\_09\_AA,  
CATS2D\_00\_AP, CATS2D\_01\_AP, CATS2D\_02\_AP, CATS2D\_03\_AP, CATS2D\_04\_AP, CATS2D\_05\_AP,  
CATS2D\_06\_AP, CATS2D\_07\_AP, CATS2D\_08\_AP, CATS2D\_09\_AP, CATS2D\_00\_AN, CATS2D\_01\_AN,  
CATS2D\_02\_AN, CATS2D\_03\_AN, CATS2D\_04\_AN, CATS2D\_05\_AN, CATS2D\_06\_AN, CATS2D\_07\_AN,  
CATS2D\_08\_AN, CATS2D\_09\_AN, CATS2D\_00\_AL, CATS2D\_01\_AL, CATS2D\_02\_AL, CATS2D\_03\_AL,  
CATS2D\_04\_AL, CATS2D\_05\_AL, CATS2D\_06\_AL, CATS2D\_07\_AL, CATS2D\_08\_AL, CATS2D\_09\_AL,  
CATS2D\_00\_PP, CATS2D\_01\_PP, CATS2D\_02\_PP, CATS2D\_03\_PP, CATS2D\_04\_PP, CATS2D\_05\_PP,  
CATS2D\_06\_PP, CATS2D\_07\_PP, CATS2D\_08\_PP, CATS2D\_09\_PP, CATS2D\_00\_PN, CATS2D\_01\_PN,  
CATS2D\_02\_PN, CATS2D\_03\_PN, CATS2D\_04\_PN, CATS2D\_05\_PN, CATS2D\_06\_PN, CATS2D\_07\_PN,  
CATS2D\_08\_PN, CATS2D\_09\_PN, CATS2D\_00\_PL, CATS2D\_01\_PL, CATS2D\_02\_PL, CATS2D\_03\_PL,  
CATS2D\_04\_PL, CATS2D\_05\_PL, CATS2D\_06\_PL, CATS2D\_07\_PL, CATS2D\_08\_PL, CATS2D\_09\_PL,  
CATS2D\_00\_NN, CATS2D\_01\_NN, CATS2D\_02\_NN, CATS2D\_03\_NN, CATS2D\_04\_NN, CATS2D\_05\_NN,  
CATS2D\_06\_NN, CATS2D\_07\_NN, CATS2D\_08\_NN, CATS2D\_09\_NN, CATS2D\_00\_NL, CATS2D\_01\_NL,  
CATS2D\_02\_NL, CATS2D\_03\_NL, CATS2D\_04\_NL, CATS2D\_05\_NL, CATS2D\_06\_NL, CATS2D\_07\_NL,  
CATS2D\_08\_NL, CATS2D\_09\_NL, CATS2D\_00\_LL, CATS2D\_01\_LL, CATS2D\_02\_LL, CATS2D\_03\_LL,  
CATS2D\_04\_LL, CATS2D\_05\_LL, CATS2D\_06\_LL, CATS2D\_07\_LL, CATS2D\_08\_LL, CATS2D\_09\_LL

---

**Table S2.** Compound Nos. of the test set molecules with respect to the employed clusters.

| Cluster number | Sl. No. of test set chemicals                                                                                                                                                                                                                       |
|----------------|-----------------------------------------------------------------------------------------------------------------------------------------------------------------------------------------------------------------------------------------------------|
| 1              | 29, 33, 34, 51, 56, 57, 63, 65, 109, 112, 115, 118, 132, 145, 197, 199, 217                                                                                                                                                                         |
| 2              | 188                                                                                                                                                                                                                                                 |
| 3              | 95, 97, 99, 100, 155, 170                                                                                                                                                                                                                           |
| 4              | 7, 9, 17, 36, 38, 39, 74, 88, 90, 163, 213, 228, 236, 264, 267, 290, 291                                                                                                                                                                            |
| 5              | 2, 4, 20, 32, 46, 48, 77, 82, 102, 103, 138, 141, 149, 150, 151, 154, 165, 167, 174, 187, 190, 196, 198, 201, 205, 207, 208, 210, 212, 223, 239, 243, 244, 248, 250, 254, 256, 259, 261, 268, 281, 283, 284, 285, 286, 288, 298, 300, 303, 304, 305 |
| 6              | –                                                                                                                                                                                                                                                   |

**Table S3.** Definition of some of the employed statistical validation metrics.

| Type                        | Mathematical definition*                                                                                                         | Refs. |
|-----------------------------|----------------------------------------------------------------------------------------------------------------------------------|-------|
| Model fitness measures      | $R^2 = 1 - \frac{\sum (Y_{obs(train)} - Y_{calc(train)})^2}{\sum (Y_{obs(train)} - \bar{Y}_{train})^2}$                          | 7, 43 |
|                             | $R_a^2 = \frac{(n_{train} - 1) \times R^2 - p}{n_{train} - p - 1}$                                                               |       |
|                             | $F = \frac{[\sum (Y_{calc(train)} - \bar{Y}_{train})^2] / p}{[\sum (Y_{obs(train)} - Y_{calc(train)})^2] / (n_{train} - p - 1)}$ |       |
| Internal validation metric  | $Q_{LOO}^2 = 1 - \frac{\sum (Y_{obs(train)} - Y_{pred(train)})^2}{\sum (Y_{obs(train)} - \bar{Y}_{train})^2}$                    | 7     |
| External validation metrics | $Q_{ext(F1)}^2 = R_{pred}^2 = 1 - \frac{\sum (Y_{obs(test)} - Y_{pred(test)})^2}{\sum (Y_{obs(test)} - \bar{Y}_{train})^2}$      | 7     |
|                             | $Q_{ext(F2)}^2 = 1 - \frac{\sum (Y_{obs(test)} - Y_{pred(test)})^2}{\sum (Y_{obs(test)} - \bar{Y}_{test})^2}$                    |       |

\* The terms used in the equations are explained below.

$n_{train}$  = Number of compounds in the training set

$n_{test}$  = Number of compounds in the test set

$p$  = Number of descriptors present in the model

$Y_{obs(train)}$  = Experimental response values of the training set compounds

$Y_{calc(train)}$  = Calculated response values of the training set compounds

$\bar{Y}_{train}$  = Mean experimental response value of the training set compounds

$Y_{pred(train)}$  = Predicted response values of the training set compounds

$Y_{obs(test)}$  = Experimental response values of the test set compounds

$Y_{pred(test)}$  = Predicted response values of the test set compounds

$\bar{Y}_{test}$  = Mean experimental response value of the test set compounds



**Table S4.** Experimental and computed *Vibrio fischeri* toxicity of ILs.

| Sl. No.                       | Formulae of the ILs    | Ecotoxicity to <i>Vibrio fischeri</i> ( $pEC_{50}$ considering $EC_{50}$ in mol L <sup>-1</sup> ) |                              |      |
|-------------------------------|------------------------|---------------------------------------------------------------------------------------------------|------------------------------|------|
|                               |                        | Expt. values                                                                                      | Predicted values (consensus) | Refs |
| <b>Training set chemicals</b> |                        |                                                                                                   |                              |      |
| 1                             | [IM1,3][N(CF3SO2)2]    | 3.2277                                                                                            | 3.2128                       | 30   |
| 3                             | [IM1,4][N(CF3SO2)2]    | 3.4704                                                                                            | 3.3560                       | 29   |
| 5                             | [IM1,6][PF6]           | 3.8901                                                                                            | 3.7548                       | 29   |
| 6                             | [IM1,8][PF6]           | 5.2989                                                                                            | 4.5707                       | 29   |
| 8                             | [TMGC7]I               | 5.0725                                                                                            | 5.5746                       | 31   |
| 10                            | [DMG(di-h)2]Cl         | 5.0821                                                                                            | 5.3928                       | 31   |
| 11                            | [DMG(C3O)4]Cl          | 3.5591                                                                                            | 3.9135                       | 31   |
| 12                            | [IM1,2O2O1]Cl          | 3.7359                                                                                            | 2.6391                       | 31   |
| 13                            | [P6,6,6,14]Br          | 4.9464                                                                                            | 4.6255                       | 31   |
| 14                            | [P6,6,6,14]Cl          | 5.0144                                                                                            | 5.0127                       | 31   |
| 15                            | [P6,6,6,14][CH3SO3]    | 5.0594                                                                                            | 4.7463                       | 31   |
| 16                            | [P4,4,4,4]Br           | 3.2932                                                                                            | 3.0180                       | 31   |
| 18                            | [P1,(4,4,4)i][ToS]     | 3.3601                                                                                            | 2.7312                       | 31   |
| 19                            | [IM1,4]Br              | 2.4739                                                                                            | 2.6554                       | 31   |
| 21                            | [IM1,4][ToS]           | 2.6769                                                                                            | 2.4797                       | 31   |
| 22                            | [IM1,3][PF6]           | 2.4452                                                                                            | 2.8468                       | 32   |
| 23                            | [PYR1,3][PF6]          | 1.9894                                                                                            | 2.4514                       | 32   |
| 24                            | [PYD1,3][PF6]          | 3.2137                                                                                            | 3.2223                       | 32   |
| 25                            | [PIP1,3][PF6]          | 2.4102                                                                                            | 2.5499                       | 32   |
| 26                            | [N1,1,1,2OH][Bic]      | 3.7474                                                                                            | 2.5862                       | 34   |
| 27                            | [N1,1,1,2OH]Cl         | 2.9469                                                                                            | 2.7694                       | 34   |
| 28                            | [N1,1,1,2OH][Ac]       | 2.7913                                                                                            | 2.5800                       | 34   |
| 30                            | [N1,1,1,2OH][DHCit]    | 4.1268                                                                                            | 3.1859                       | 34   |
| 31                            | [N1,1,1,2OH][Sal]      | 3.5078                                                                                            | 2.7451                       | 34   |
| 35                            | [N4,4,4,6][N(CF3SO2)2] | 4.5189                                                                                            | 4.0170                       | 24   |
| 37                            | [N4,4,4,6][PF6]        | 3.8241                                                                                            | 4.0125                       | 24   |
| 40                            | [P4,4,4,4][PF6]        | 3.5557                                                                                            | 3.3520                       | 24   |
| 41                            | [N1,8,8,8][N(CF3SO2)2] | 4.4449                                                                                            | 5.0451                       | 24   |
| 42                            | [P1,8,8,8][N(CF3SO2)2] | 5.1829                                                                                            | 4.9840                       | 24   |
| 43                            | [IM1,4i][N(CF3SO2)2]   | 3.1696                                                                                            | 3.1802                       | 25   |
| 44                            | [PYD1,4][N(CF3SO2)2]   | 4.0218                                                                                            | 3.7216                       | 25   |
| 45                            | [PYD1,4i][N(CF3SO2)2]  | 3.5409                                                                                            | 3.7345                       | 25   |
| 47                            | [PYR1,4i][N(CF3SO2)2]  | 3.0604                                                                                            | 3.1350                       | 25   |
| 49                            | [PIP1,4i][N(CF3SO2)2]  | 3.3493                                                                                            | 3.4818                       | 25   |
| 50                            | [IM1,2][CHES]          | 2.9427                                                                                            | 2.9486                       | 28   |
| 52                            | [IM1,2][MES]           | 1.3157                                                                                            | 2.1728                       | 28   |

|     |                                     |        |        |    |
|-----|-------------------------------------|--------|--------|----|
| 53  | [IM1,2][TES]                        | 2.0022 | 2.3038 | 28 |
| 54  | [IM1,2][TRICINE]                    | 2.7115 | 2.6558 | 28 |
| 55  | [N1,1,1,1][CHES]                    | 3.1011 | 3.2497 | 28 |
| 58  | [N2,2,2,2][CHES]                    | 3.1504 | 2.6585 | 28 |
| 59  | [N2,2,2,2][HEPES]                   | 1.8180 | 2.0140 | 28 |
| 60  | [N2,2,2,2][MES]                     | 0.8648 | 1.8828 | 28 |
| 61  | [N2,2,2,2][TES]                     | 1.2309 | 2.0137 | 28 |
| 62  | [N2,2,2,2][TRICINE]                 | 2.3984 | 2.3658 | 28 |
| 64  | [N4,4,4,4][HEPES]                   | 3.3455 | 2.9070 | 28 |
| 66  | [N4,4,4,4][TES]                     | 3.2390 | 2.9352 | 28 |
| 67  | [N4,4,4,4][TRICINE]                 | 3.3681 | 3.3981 | 28 |
| 68  | [N1,1,2,2OH]Br                      | 0.8884 | 1.7669 | 27 |
| 69  | [N1,1,3,2OH]Br                      | 0.7955 | 1.8348 | 27 |
| 70  | [N1,1,4,2OH]Br                      | 1.2260 | 1.8621 | 27 |
| 71  | [N1,1,5,2OH]Br                      | 1.9010 | 2.1396 | 27 |
| 72  | [N1,1,6,2OH]Br                      | 2.5323 | 2.5175 | 27 |
| 73  | [N1,1,8,2OH]Br                      | 3.2386 | 3.2687 | 27 |
| 75  | [N1,1,2OH,CH2CHCH2]Br               | 1.0045 | 1.7581 | 27 |
| 76  | [N1,1,2OH,CH2CCH]Br                 | 2.9455 | 1.7191 | 27 |
| 78  | [N1,3,2OH,2OH]Br                    | 2.1797 | 2.1173 | 27 |
| 79  | [N1,6,2OH,2OH]Br                    | 3.0113 | 2.7910 | 27 |
| 80  | [N1,12,2OH,2OH]Br                   | 4.6395 | 4.2878 | 27 |
| 81  | [N1,2OH,2OH,CH2CHCH2]Br             | 1.9418 | 2.0796 | 27 |
| 83  | [N1,2OH,2OH,(CH2)4CHCH2]Br          | 2.3328 | 2.7527 | 27 |
| 84  | [N6,2OH,2OH,2OH]Br                  | 4.2020 | 3.0338 | 27 |
| 85  | [N1,2OH,2OH,6,N1,2OH,2OH][2Br]      | 1.8968 | 2.8376 | 27 |
| 86  | [N1,2OH,2OH,8,N1,2OH,2OH][2Br]      | 1.9613 | 3.4734 | 27 |
| 87  | [N1,2OH,2OH,10,N1,2OH,2OH][2Br]     | 3.1413 | 4.0239 | 27 |
| 89  | [N2OH,2OH,2OH,6,N2OH,2OH,2OH][2Br]  | 3.1137 | 2.7644 | 27 |
| 91  | [N2OH,2OH,2OH,10,N2OH,2OH,2OH][2Br] | 4.7283 | 3.7703 | 27 |
| 92  | [N2OH,2OH,2OH,12,N2OH,2OH,2OH][2Br] | 5.0081 | 3.9015 | 27 |
| 93  | [PYD1(PhOOCH2)(COOCH3)]Br           | 3.1523 | 2.7641 | 33 |
| 94  | [IM1,1(COOCH3)(PhOOCH2)]Cl          | 3.6412 | 3.0673 | 33 |
| 96  | [IM1(PhOOCH2)(COOC4H9)]Br           | 3.6596 | 2.9427 | 33 |
| 98  | [PYDCH2COOCH(COOCH3)(PhOOCH2)][Br]  | 2.6588 | 3.1743 | 33 |
| 101 | [DABCO2]Br                          | 0.4000 | 1.4952 | 20 |
| 104 | [DABCO8]Br                          | 3.7000 | 3.5290 | 20 |
| 105 | [DABCO10]Br                         | 4.7000 | 4.3714 | 20 |
| 106 | [N1,1,2OH][Ace]                     | 1.7100 | 2.3882 | 23 |
| 107 | [2-HEA][But]                        | 1.8202 | 2.6784 | 16 |
| 108 | [2-HDEA][Ace]                       | 1.9743 | 2.0194 | 16 |
| 110 | [2-HDEA][For]                       | 2.2757 | 2.0104 | 16 |
| 111 | [2-HDEA][iB]                        | 2.3565 | 2.0681 | 16 |

|     |                                                        |        |        |    |
|-----|--------------------------------------------------------|--------|--------|----|
| 113 | [2-HDEA][Pr]                                           | 2.4401 | 2.1490 | 16 |
| 114 | [N1,1,2,2O1][N(CF3SO2)2]                               | 2.6500 | 2.6841 | 23 |
| 116 | [N1,1,2,1COO2][N(CF3SO2)2]                             | 2.6800 | 2.7562 | 23 |
| 117 | [N4,4,4,4]Br                                           | 2.7300 | 3.0264 | 23 |
| 119 | [N1,1,2,4][N(CF3SO2)2]                                 | 2.7852 | 3.2582 | 16 |
| 120 | [2-HDEA][Pe]                                           | 2.7721 | 2.4569 | 16 |
| 121 | [N4,4,4,4]Cl                                           | 3.3100 | 3.2743 | 23 |
| 122 | [N2,2,2,6]Br                                           | 3.5400 | 3.1169 | 23 |
| 123 | [N1,1,Bn,2O2OPh((4-<br>C(CH3)2CH2C(CH3)3)][N(CF3SO2)2] | 3.8620 | 4.5351 | 16 |
| 124 | [N1,1,Bn,2O2OPh((4-<br>C(CH3)2CH2C(CH3)3)][Sal]        | 4.1851 | 4.5063 | 16 |
| 125 | [N1,1,Bn,2O2OPh((4-<br>C(CH3)2CH2C(CH3)3)][Cl]         | 4.3883 | 4.8491 | 16 |
| 126 | [N1,1,8,Bn]Cl                                          | 4.7235 | 5.0626 | 16 |
| 127 | [N1,1,8,Bn][Sal]                                       | 4.8210 | 5.0383 | 16 |
| 128 | [N1,1,1,16]Cl                                          | 5.6000 | 5.3560 | 23 |
| 129 | [N1,1,1,16]Br                                          | 5.9600 | 5.1081 | 23 |
| 130 | [N1,1,12,Bn]Cl                                         | 6.2300 | 5.2362 | 23 |
| 131 | [N1,1,16,Bn]Cl                                         | 6.3100 | 5.3163 | 23 |
| 133 | [IM1,2][FAP]                                           | 3.2549 | 3.1382 | 35 |
| 134 | [IM1,8]Br                                              | 3.5607 | 4.2320 | 35 |
| 135 | [IM1,6]Br                                              | 3.6073 | 3.4156 | 35 |
| 136 | [IM1,1][CH3SO4]                                        | 1.2400 | 1.9641 | 22 |
| 137 | [IM1,2]Cl                                              | 1.4500 | 2.5320 | 22 |
| 139 | [IM1,2O2]Br                                            | 1.7167 | 2.0376 | 16 |
| 140 | [IM1,2][TFA]                                           | 1.7200 | 2.4781 | 23 |
| 142 | [IM1,2O1]Cl                                            | 1.8239 | 2.1808 | 16 |
| 143 | [IM1,2][SCN]                                           | 1.8500 | 2.3747 | 23 |
| 144 | [IM1,2O1][BF4]                                         | 1.8533 | 2.0754 | 16 |
| 146 | [IM][TFA]                                              | 1.9300 | 2.3015 | 23 |
| 147 | [IM1,2O1][N(CN)2]                                      | 1.9352 | 1.9559 | 16 |
| 148 | [IM1,2OH][N(CF3SO2)2]                                  | 1.9547 | 2.4825 | 16 |
| 152 | [IM1,3][BF4]                                           | 2.0600 | 2.5478 | 22 |
| 153 | [IM1,2OH]Cl                                            | 2.1100 | 2.0298 | 16 |
| 156 | [IM1,1CN][N(CF3SO2)2]                                  | 2.1871 | 2.2178 | 16 |
| 157 | [IM1,3OH][N(CF3SO2)2]                                  | 2.1871 | 2.6066 | 16 |
| 158 | [IM][TFO]                                              | 2.1900 | 2.4178 | 23 |
| 159 | [IM1,2O2O1][BF4]                                       | 2.2147 | 2.5379 | 16 |
| 160 | [IM1,2O2O2O1][N(CN)2]                                  | 2.3098 | 2.7530 | 16 |
| 161 | [IM1,4][N(CN)2]                                        | 2.3300 | 2.5718 | 23 |
| 162 | [IM][Ace]                                              | 2.3900 | 2.1661 | 23 |
| 164 | [IM1,4]I                                               | 2.4100 | 2.6961 | 23 |

|     |                         |        |        |    |
|-----|-------------------------|--------|--------|----|
| 166 | [IM1,2][B(CN)4]         | 2.4400 | 2.4714 | 23 |
| 168 | [IM1,4][pToS ]          | 2.4800 | 2.3731 | 16 |
| 169 | [IM1,4][N(CF3)2]        | 2.5300 | 2.8496 | 23 |
| 171 | [IM4][Ace]              | 2.6800 | 2.7231 | 16 |
| 172 | [IM4][TFA]              | 2.7200 | 2.8585 | 23 |
| 173 | [IM1,3O1][N(CF3SO2)2]   | 2.7959 | 2.7335 | 16 |
| 175 | [IM1,6][BF4]            | 2.8200 | 3.5582 | 22 |
| 176 | [IM1,5][BF4]            | 2.8600 | 3.1431 | 22 |
| 177 | [IM1,2][Sal]            | 2.8684 | 2.5077 | 16 |
| 178 | [IM1,2][(C2F5)2PO2]     | 2.9500 | 3.0601 | 23 |
| 179 | [IM1,2O1][N(CF3SO2)2]   | 3.0000 | 2.6336 | 23 |
| 180 | [IM1,1O2][N(CF3SO2)2]   | 3.0000 | 2.6363 | 16 |
| 181 | [IM1,2][B(2-OPhO)2]     | 3.0200 | 2.7659 | 23 |
| 182 | [IM1,2O2][N(CF3SO2)2]   | 3.0400 | 2.7383 | 23 |
| 183 | [IM1,4]Cl               | 3.0500 | 2.7968 | 22 |
| 184 | [IM1][For]              | 3.1700 | 2.5406 | 23 |
| 185 | [IM1,2O1][N(CF3SO2)2]   | 3.1739 | 2.6336 | 16 |
| 186 | [IM2,4][BF4]            | 3.2000 | 2.6143 | 22 |
| 189 | [IM1,2O2O2O2O1][N(CN)2] | 3.3468 | 2.9882 | 16 |
| 191 | [IM1,7][BF4]            | 3.5600 | 3.9700 | 22 |
| 192 | [IM][CAP]               | 3.7100 | 3.0928 | 23 |
| 193 | [IM1,2O2O1]Cl           | 3.7358 | 2.6433 | 16 |
| 194 | [IM2,6][BF4]            | 3.8500 | 3.5276 | 22 |
| 195 | [IM1][Cap]              | 3.8700 | 3.3071 | 23 |
| 200 | [IM1,1,6]Cl             | 4.2600 | 3.5660 | 22 |
| 202 | [IM1,4][FeCl4]          | 4.4900 | 3.0387 | 23 |
| 203 | [IM1,8][BF4]            | 4.5900 | 4.3745 | 22 |
| 204 | [IM1,18]Cl              | 4.6500 | 5.5458 | 23 |
| 206 | [IM1,10COO2]Br          | 4.9222 | 4.5520 | 16 |
| 209 | [IM1,9][BF4]            | 5.2800 | 4.7722 | 22 |
| 211 | [IM1,16]Cl              | 5.7700 | 5.5094 | 23 |
| 214 | [IM1,10][BF4]           | 6.1800 | 5.1632 | 22 |
| 215 | [IM1,10][FeCl4]         | 6.4300 | 5.5105 | 23 |
| 216 | [Melanime][TfO]         | 3.5500 | 3.4184 | 16 |
| 218 | [Melanime][TFA]         | 3.7600 | 3.3022 | 16 |
| 219 | [MOR1,4][CF3SO3]        | 1.6000 | 1.9222 | 16 |
| 220 | [MOR1,8]Br              | 3.6000 | 3.1829 | 20 |
| 221 | [MOR1,4]Br              | 0.5500 | 1.6120 | 16 |
| 222 | [MOR1,4][N(CN)2]        | 1.1100 | 1.6350 | 16 |
| 224 | [MOR1,6]Br              | 2.0500 | 2.3629 | 20 |
| 225 | [MOR1,1O2][N(CF3SO2)2]  | 2.6200 | 3.1924 | 23 |
| 226 | [MOR1,1(CH)OH1OH][Br]   | 2.7700 | 2.0582 | 20 |
| 227 | [MOR1,4][N(CF3SO2)2]    | 3.5086 | 2.3031 | 16 |

|     |                            |        |        |    |
|-----|----------------------------|--------|--------|----|
| 229 | [P2,4,4,4][(CH3CH2)2PO4]   | 2.9300 | 3.1319 | 23 |
| 230 | [TROP8][N(CN)2]            | 3.4800 | 3.4328 | 16 |
| 231 | [P6,6,6,14][P(C2F5)3F3]    | 4.3000 | 4.7259 | 23 |
| 232 | [PIP2,8][BPh4]             | 3.2277 | 4.2060 | 35 |
| 233 | [PIP2,8]Br                 | 3.4522 | 3.7811 | 35 |
| 234 | [PIP1,8]Br                 | 3.5346 | 3.9461 | 35 |
| 235 | [PIP2,8]I                  | 3.5376 | 3.9284 | 35 |
| 237 | [PIP1,6]Br                 | 3.0600 | 3.1110 | 16 |
| 238 | [PIP1,4]Br                 | 3.6271 | 2.3430 | 35 |
| 240 | [PIP1,3][N(CF3SO2)2]       | 2.9900 | 2.9159 | 17 |
| 241 | [PYD3OH][N(CF3SO2)2]       | 1.9900 | 2.4969 | 23 |
| 242 | [PYD4]Br                   | 2.2800 | 2.5468 | 16 |
| 245 | [PYD1,4][BF4]              | 2.9800 | 3.1636 | 23 |
| 246 | [PYD4][Al2Cl7]             | 2.9900 | 3.3086 | 23 |
| 247 | [PYD1,1,4]Br               | 3.0700 | 3.5621 | 16 |
| 249 | [PYD1,1,4][CF3SO3]         | 3.1600 | 3.8724 | 16 |
| 251 | [PYD1,1,4]Br               | 3.3111 | 3.4838 | 16 |
| 252 | [PYD1,4][N(CN)2]           | 3.3437 | 3.0440 | 16 |
| 253 | [PYD4,N(CH3)2]Cl           | 3.4800 | 3.1217 | 23 |
| 255 | [PYD1,1,4][N(CN)2]         | 3.6181 | 3.5068 | 16 |
| 257 | [PYD8]Br                   | 4.1100 | 4.1648 | 16 |
| 258 | [PYD1,1,4][N(CF3SO2)2]     | 4.1439 | 4.1562 | 16 |
| 260 | [PYD1,1,1,4][N(CF3SO2)2]   | 4.4377 | 4.6753 | 16 |
| 262 | [PYD1,6]Cl                 | 4.5600 | 3.2685 | 22 |
| 263 | [PYD6,N(CH3)2][N(CF3SO2)2] | 4.6200 | 4.1850 | 23 |
| 265 | [PYD1,1,8]Br               | 4.8761 | 5.0359 | 16 |
| 266 | [PYD1,1,8][BF4]            | 5.0300 | 5.1784 | 16 |
| 269 | [PYD1,1,1,8][N(CF3SO2)2]   | 5.3768 | 5.4746 | 16 |
| 270 | [PYD1,2,8]Br               | 5.4100 | 4.9790 | 16 |
| 271 | [PYD1,1,8][N(CF3SO2)2]     | 5.6400 | 5.5323 | 23 |
| 272 | [PYD1,8]Br                 | 5.7500 | 4.6028 | 22 |
| 273 | [PYR1,8][N(CF3SO2)2]       | 3.3206 | 4.4541 | 35 |
| 274 | [TROP8][N(CF3SO2)2]        | 3.8300 | 3.7995 | 16 |
| 275 | [PYR1,4][CF3SO3]           | 3.5361 | 2.4152 | 35 |
| 276 | [PYR1,8]Br                 | 3.5560 | 3.8887 | 35 |
| 277 | [Pyr1,6]Br                 | 2.8100 | 3.0343 | 16 |
| 278 | [PYR1,8]Cl                 | 3.6308 | 4.1366 | 35 |
| 279 | [PYR1,4][N(CN)2]           | 3.6819 | 2.2697 | 35 |
| 280 | [PYR4,3CN]Br               | 0.6700 | 1.4445 | 16 |
| 282 | [PYR4]Cl                   | 1.7000 | 2.5652 | 26 |
| 287 | [PYR4][N(CF3SO2)2]         | 3.4600 | 3.0179 | 26 |
| 289 | [PYR1,4][P(C2F5)3F3]       | 4.3000 | 3.0153 | 23 |
| 292 | [QUINU4]Br                 | 1.5500 | 1.0683 | 16 |

|                           |                                    |        |        |    |
|---------------------------|------------------------------------|--------|--------|----|
| 293                       | [S2,2,2][N(CF3SO2)2]               | 2.7400 | 3.3762 | 23 |
| 294                       | [TMG][TfO]                         | 2.4800 | 3.3835 | 23 |
| 295                       | [TMG][Ace]                         | 2.8300 | 3.1318 | 23 |
| 296                       | [TMG][Cap]                         | 3.7100 | 4.0585 | 23 |
| 297                       | [TMG][TFA]                         | 5.5300 | 3.2672 | 23 |
| 299                       | [TROP4]I                           | 1.2600 | 1.9499 | 16 |
| 301                       | [TROP4][N(CF3SO2)2]                | 3.3900 | 2.3682 | 16 |
| 302                       | [IM1,1,4]Br                        | 2.7477 | 2.3882 | 36 |
| <b>Test set chemicals</b> |                                    |        |        |    |
| 2                         | [IM1,2][N(CF3SO2)2]                | 3.4310 | 2.9944 | 29 |
| 4                         | [IM1,4][PF6]                       | 2.9301 | 2.9901 | 29 |
| 7                         | [TMGC4]I                           | 4.0649 | 3.5502 | 31 |
| 9                         | [TMGC12]I                          | 4.5702 | 5.2516 | 31 |
| 17                        | [P1,(4,4,4)i][CH3SO4]              | 3.1457 | 2.5415 | 31 |
| 20                        | [IM1,4][CH3SO3]                    | 2.4147 | 2.8239 | 31 |
| 29                        | [N1,1,1,2OH][DHPhosp]              | 3.3315 | 2.6959 | 34 |
| 32                        | [N1,1,Bn,2OH]Cl                    | 2.5296 | 3.0187 | 34 |
| 33                        | [N1,1,1,2OH][Prop]                 | 3.1383 | 2.7097 | 34 |
| 34                        | [N1,1,1,2OH][But]                  | 2.7873 | 2.8597 | 34 |
| 36                        | [P4,4,4,6][N(CF3SO2)2]             | 5.0390 | 3.9573 | 24 |
| 38                        | [N4,4,4,4][PF6]                    | 3.5371 | 3.3571 | 24 |
| 39                        | [P4,4,4,6][PF6]                    | 4.0071 | 4.0059 | 24 |
| 46                        | [PYR1,4][N(CF3SO2)2]               | 2.9961 | 2.9467 | 25 |
| 48                        | [PIP1,4][N(CF3SO2)2]               | 3.1515 | 3.0403 | 25 |
| 51                        | [IM1,2][HEPES]                     | 1.7839 | 2.3040 | 28 |
| 56                        | [N1,1,1,1][HEPES]                  | 1.3131 | 2.6052 | 28 |
| 57                        | [N1,1,1,1][MES]                    | 2.4135 | 2.4740 | 28 |
| 63                        | [N4,4,4,4][CHES]                   | 3.3974 | 3.6488 | 28 |
| 65                        | [N4,4,4,4][MES]                    | 2.8995 | 2.9108 | 28 |
| 74                        | [N1,1,11,2OH][Br]                  | 5.6210 | 4.0805 | 27 |
| 77                        | [N3,2OH,2OH][Br]                   | 2.7900 | 2.0533 | 27 |
| 82                        | [N2OH,2OH,2OH,CH2CHCH2]Br          | 2.0299 | 2.2546 | 27 |
| 88                        | [N1,2OH,2OH,12,N1,2OH,2OH][2Br]    | 3.7625 | 4.2057 | 27 |
| 90                        | [N2OH,2OH,2OH,8,N2OH,2OH,2OH][2Br] | 4.9130 | 3.2803 | 27 |
| 95                        | [PYD1(PhOOCH2)(COOC4H9)]Br         | 3.6664 | 2.9036 | 33 |
| 97                        | [PYD1(Ph-3,4-(OCH3)2)(COOCH3)]Cl   | 3.5860 | 3.3149 | 33 |
| 99                        | [PYDCH2COOCH(COOC4H9)(PhOOCH2)]Br  | 4.3130 | 3.2621 | 33 |
| 100                       | [IM1,CH2COOCH(COOC4H9)(PhOOCH2)]Br | 4.2434 | 3.2739 | 33 |
| 102                       | [DABCO4]Br                         | 1.1500 | 1.8527 | 20 |
| 103                       | [DABCO6]Br                         | 2.3000 | 2.6671 | 20 |
| 109                       | [2-HEA][For]                       | 2.1844 | 2.3941 | 16 |
| 112                       | [2-HDEA][But]                      | 2.3820 | 2.2991 | 16 |

|     |                            |        |        |    |
|-----|----------------------------|--------|--------|----|
| 115 | [2-HTEA][But]              | 2.6757 | 2.6137 | 16 |
| 118 | [2-HTEA][Pe]               | 2.7352 | 2.7715 | 16 |
| 132 | [N1,1,1,2OH][N(CF3SO2)2]   | 1.8500 | 3.2222 | 23 |
| 138 | [IM1][TFO]                 | 1.6500 | 2.6321 | 23 |
| 141 | [IM1,2O2]Cl                | 1.7200 | 2.2856 | 16 |
| 145 | [IM1][Ace]                 | 1.9300 | 2.3805 | 23 |
| 149 | [IM1,2][C2H5SO4]           | 1.9800 | 1.9982 | 22 |
| 150 | [IM1,1O2]Cl                | 1.9900 | 2.1835 | 16 |
| 151 | [IM1,1O2][N(CN)2]          | 2.0088 | 1.9586 | 16 |
| 154 | [IM1,2OH]I                 | 2.1135 | 1.9291 | 16 |
| 155 | [IM1,2O2O1][N(CN)2]        | 2.1249 | 2.4184 | 16 |
| 163 | [TROP8][BF4]               | 3.2300 | 3.5523 | 16 |
| 165 | [IM1][TFA]                 | 2.4300 | 2.5159 | 23 |
| 167 | [IM1,4][BF4]               | 2.4500 | 2.6914 | 22 |
| 170 | [IM1,2O2O2O1][BF4]         | 2.5528 | 2.8725 | 16 |
| 174 | [IM4][For]                 | 2.8100 | 2.7141 | 16 |
| 187 | [IM4][TFO]                 | 3.2300 | 2.9747 | 16 |
| 188 | [IM1,6][N(2-SO2PhCO)]      | 3.3300 | 3.2701 | 23 |
| 190 | [IM1,6][P(C2F5)3F3]        | 3.3500 | 4.1058 | 23 |
| 196 | [IM1,6][N(CF3SO2)2]        | 3.9500 | 4.0785 | 23 |
| 197 | [IM4][Cap]                 | 4.0000 | 3.6497 | 16 |
| 198 | [IM1,6]Cl                  | 4.0600 | 3.6636 | 22 |
| 199 | [IM1,4][8OSO3]             | 4.1700 | 3.2350 | 23 |
| 201 | [IM1,2][FeCl4]             | 4.4900 | 2.7739 | 23 |
| 205 | [IM1,8]Cl                  | 4.8100 | 4.4799 | 22 |
| 207 | [IM1,8][N(CF3SO2)2]        | 5.1700 | 4.8070 | 23 |
| 208 | [IM16]Br                   | 5.1900 | 3.4156 | 22 |
| 210 | [IM1,10]Cl                 | 5.5000 | 5.2686 | 22 |
| 212 | [IM1,8]Br                  | 5.9300 | 4.2320 | 22 |
| 213 | [IM1,14]Cl                 | 6.1500 | 5.4510 | 23 |
| 217 | [Melanime][Ace]            | 3.6100 | 3.1668 | 16 |
| 223 | [MOR1,2]Br                 | 0.8000 | 1.3079 | 20 |
| 228 | [MOR1,10]Br                | 4.6500 | 3.9548 | 20 |
| 236 | [PIP2,8][SCN]              | 3.5467 | 3.8717 | 35 |
| 239 | [PIP2,4]Br                 | 2.0400 | 2.1289 | 16 |
| 243 | [PYD4][N(CN)2]             | 2.7000 | 2.5698 | 23 |
| 244 | [PYD4]Cl                   | 2.7645 | 2.7947 | 16 |
| 248 | [PYD6]Br                   | 3.1500 | 3.3270 | 16 |
| 250 | [PYD1,4]Br                 | 3.2464 | 3.0211 | 16 |
| 254 | [PYD1,1,1,4]Br             | 3.5214 | 4.0469 | 16 |
| 256 | [PYD1,1,4][SCN]            | 3.7500 | 3.5744 | 16 |
| 259 | [PYD4,N(CH3)2][N(CF3SO2)2] | 4.1549 | 3.4990 | 16 |
| 261 | [PYD1,6]Br                 | 4.5200 | 3.7796 | 22 |

|     |                          |        |        |    |
|-----|--------------------------|--------|--------|----|
| 264 | [PYD-16]Cl               | 4.7212 | 5.4878 | 16 |
| 267 | [PYD-16][Sal]            | 5.0857 | 5.4438 | 16 |
| 268 | [PYD1,1,1,8]Br           | 5.3585 | 5.0221 | 16 |
| 281 | [PYR1,4]Br               | 1.6000 | 2.2467 | 16 |
| 283 | [PYR1,3OH][N(CF3SO2)2]   | 2.0900 | 2.2013 | 23 |
| 284 | [PYR1,1COO2][N(CF3SO2)2] | 2.7700 | 2.4873 | 23 |
| 285 | [PYR1,6]Cl               | 3.0100 | 3.2822 | 22 |
| 286 | [PYR1,2O2][N(CF3SO2)2]   | 3.0300 | 2.2309 | 23 |
| 288 | [PYR1,6][N(CF3SO2)2]     | 3.6000 | 3.6876 | 23 |
| 290 | [QUINU8]Br               | 3.4949 | 2.7025 | 35 |
| 291 | [QUINU8][N(CN)2]         | 3.5143 | 2.7255 | 35 |
| 298 | [TROP4]Br                | 0.6400 | 1.8026 | 16 |
| 300 | [TROP4][SCN]             | 1.9300 | 1.8932 | 16 |
| 303 | [IM1,1,6]Br              | 2.9350 | 3.3180 | 36 |
| 304 | [IM1,1,8]Br              | 4.2423 | 4.1862 | 36 |
| 305 | [IM1,2]Br                | 1.7312 | 2.2841 | 36 |
